# Supplementary material
Source: PubMed Central journal article supplement (PMC8343944)
Supplement: NIHMS1716261-supplement-Supplemental_Material.pdf [file NIHMS1716261-supplement-Supplemental_Material.pdf]

## Supplementary Figure S1

CX26

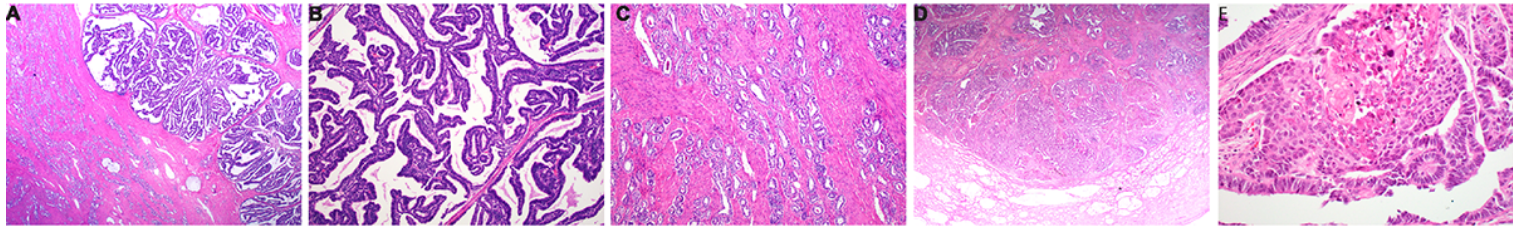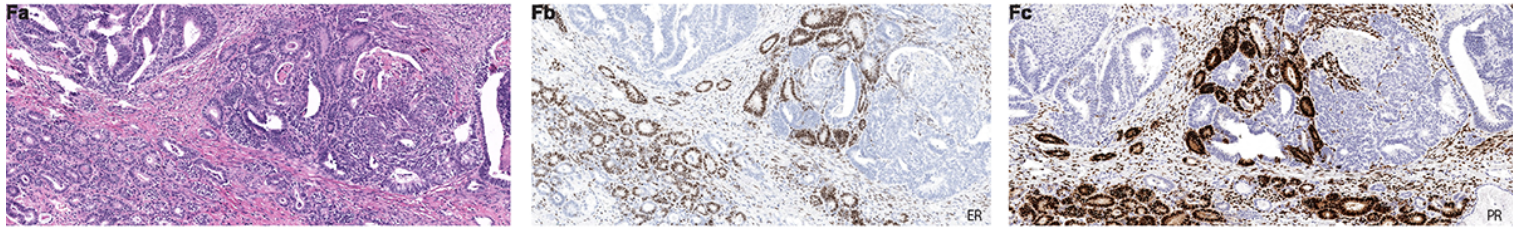

OV75

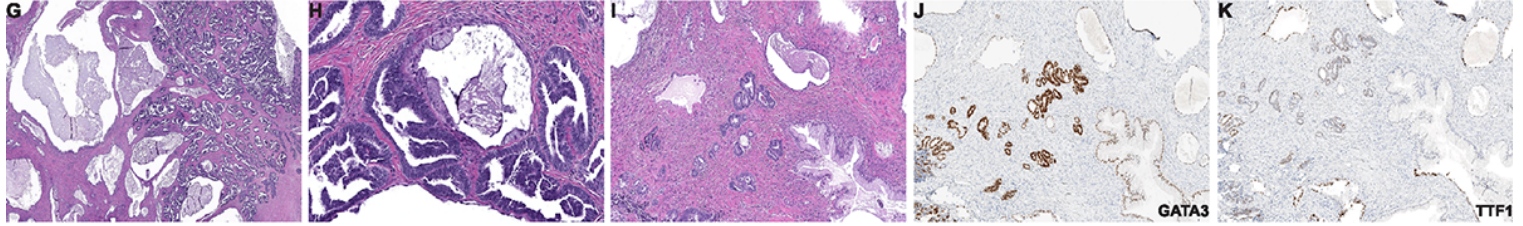

OV21

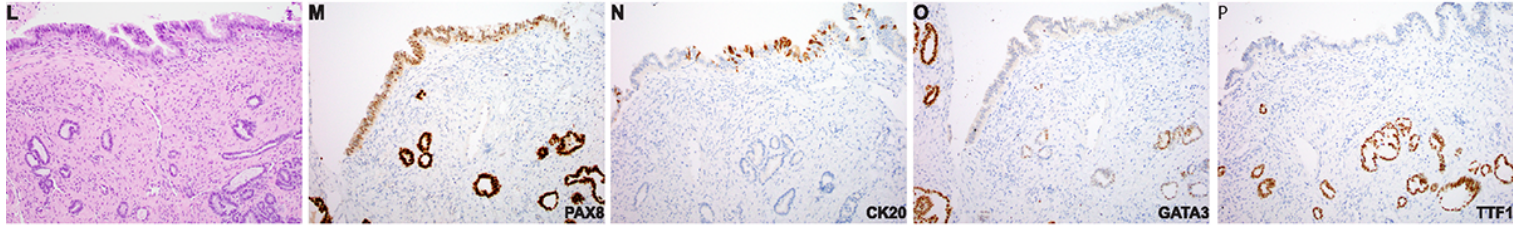

OV74

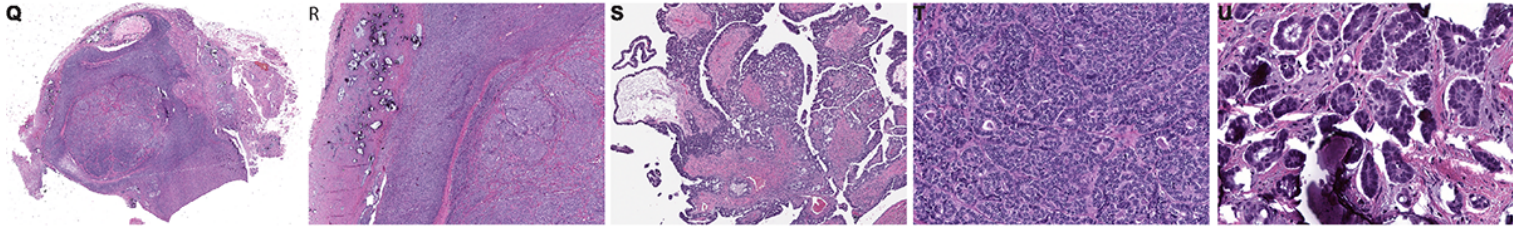

OV2

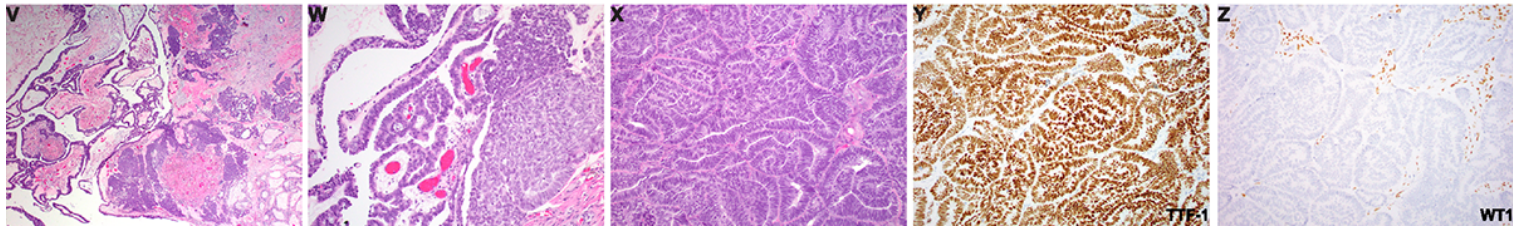

**Supplementary Figure S1:** Morphologic patterns of cervical mesonephric and ovarian mesonephric-like carcinomas with mixed histology and matched metastasis.

Representative hematoxylin and eosin-stained (H&E) sections and immunohistochemistry of the histologically distinct components of cervical mixed mesonephric and endometrioid carcinoma CX26 (A-F), including the intramural and exophytic components of mesonephric carcinoma (A), exophytic mesonephric component with slender villoglandular-like architecture (B), intramural mesonephric component with tubules containing eosinophilic luminal secretions (C), endometrioid (top) component juxtaposed to mesonephric (bottom) component (D) and endometrioid component with squamous differentiation (E), H&E showing the endometrioid component on high power with focal squamous differentiation on right (Fa), ER (Fb) and PR (Fc); Mixed mesonephric-like carcinoma and mucinous borderline tumor OV75 (G-K), showing mesonephric carcinoma (right) and mucinous neoplasm (left) (G), higher power showing intimate association of the two components (H), H&E of mixed components corresponding to immunohistochemistry (I), GATA3 expressed in both mesonephric-like and mucinous tumors (J) and TTF-1 expressed only in mesonephric-like component (K); Mesonephric-like carcinoma and mucinous borderline tumor OV21 (L-P), H&E showing gastrointestinal type mucinous component lining cyst wall (top) with mesonephric-like component within stroma (L), immunohistochemistry shows diffuse PAX8 expression in both components (M), focal CK20 expression in the mucinous component only (N); GATA3 (O) and TTF-1 (P) expression in mesonephric component only; Mesonephric-like and low-grade serous carcinoma (LGS) OV74 (Q-U), whole slide image of ovary with central nodule of mesonephric-like carcinoma and LGSC along ovarian surface (Q), intermediate power of mesonephric-like carcinoma (right) and LGSC with psammoma bodies (left) (R), serous borderline tumor (SBT) with micropapillary/microcystic appearance (S), high power of mesonephric-like carcinoma (T) and LGSC (U); Ovarian mesonephric-like carcinoma with serous borderline tumor (OV2) with matched pelvic recurrence (V-Z), SBT (left) mixed with mesonephric-like carcinoma (right) (V-W) and pelvic recurrence comprised of mesonephric-like carcinoma only (X), which was diffusely TTF-1 positive (Y) and WT1 negative (Z).
